# Supplementary material for: Pressure-driven significant phonon mode softening and robust superconductivity in layered germanium phosphide
Source: Royal Society of Chemistry journal article supplement (doi:10.1039/d0ta07243e), 2020-01-01
Supplement: d0ta07243e1.pdf [file d0ta07243e1.pdf]

# Supporting Information for

## Pressure-driven significant phonon mode softening and robust superconductivity in layered germanium phosphide

Jingyan Song,<sup>ab#</sup> Ge Fei,<sup>a#</sup> Xiaobing Liu,<sup>\*a</sup> Shuai Duan,<sup>a</sup> Bingchao Yang,<sup>a</sup> Xin Chen,<sup>a\*</sup> David J. Singh,<sup>c</sup> Yunxian Liu,<sup>a</sup> Liuxiang Yang,<sup>\*b</sup> Jiangang Guo<sup>de</sup> and Ping Zhang<sup>af</sup>

<sup>a</sup>School of Physics and Physical Engineering, Qufu Normal University, Qufu, Shandong 273165, China.

<sup>b</sup>Center for High Pressure Science and Technology Advanced Research, Beijing 100094, China.

<sup>c</sup>Department of Chemistry, University of Missouri, Columbia MO 65211, USA.

<sup>d</sup>School of Physics, University of Chinese Academy of Sciences, Beijing 100094, China.

<sup>e</sup>Songshan Lake Materials Laboratory, Dongguan, Guangdong 523808, China.

<sup>f</sup>Institute of Applied Physics and Computational Mathematics, Beijing, 71037, China.

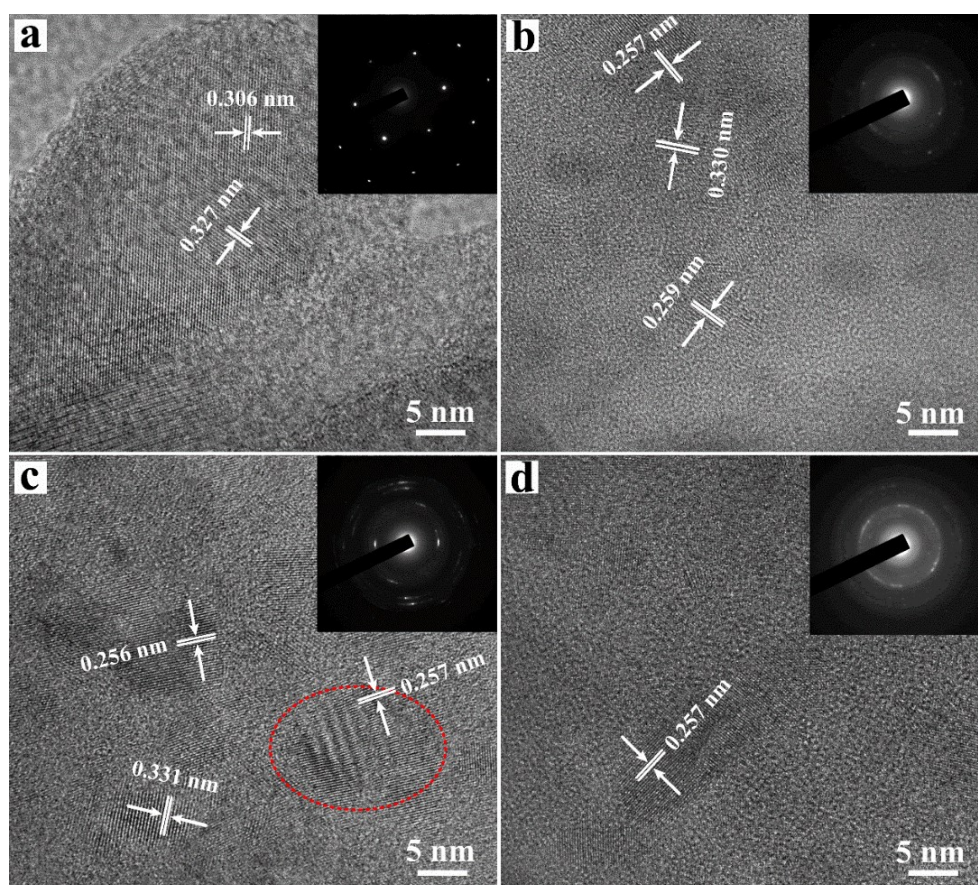

**Fig. S1.** Typical TEM and SEAD images for GeP<sub>5</sub> at ambient condition (a) and decompressed from 18.5 GPa (b), 53.5 GPa (c) and 60.3 GPa (d), indicating pressure-induced amorphous structures and deformation (shown in the red dashed area in c).

\*Correspondence and requests for materials should be addressed to X.L. (email: [xiaobing.phy@qfnu.edu.cn](mailto:xiaobing.phy@qfnu.edu.cn)); X.C. (email: [chenxin@qfnu.edu.cn](mailto:chenxin@qfnu.edu.cn)); or to L.Y. (email: [liuxiang.yang@hpstar.ac.cn](mailto:liuxiang.yang@hpstar.ac.cn))

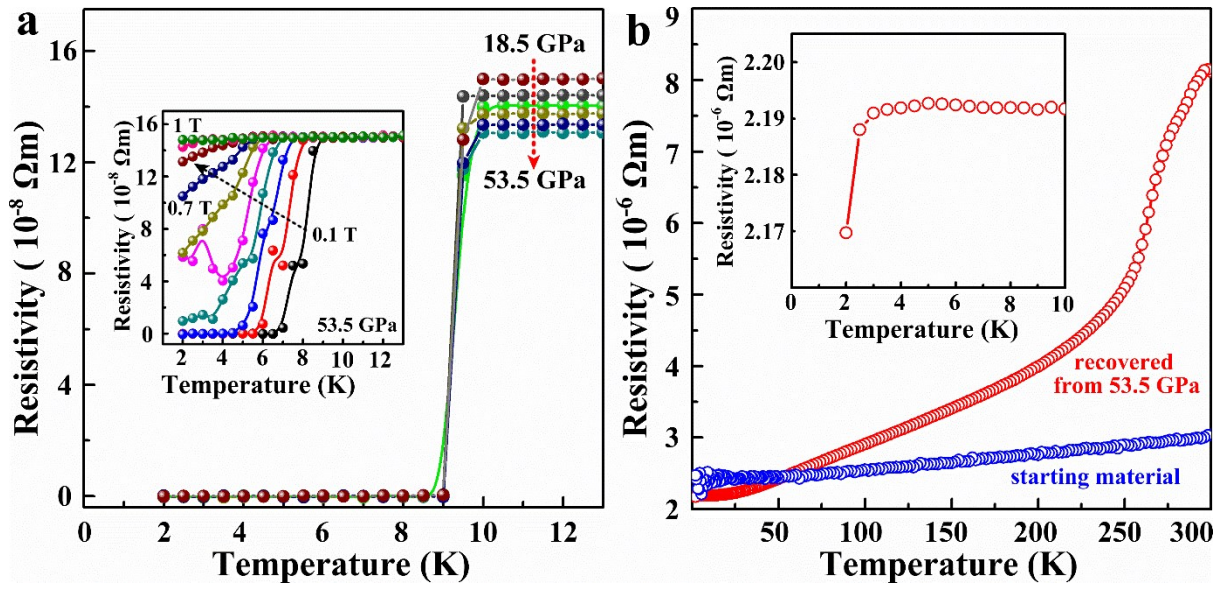

**Fig. S2.** (a) Electrical resistivity as a function of temperature in the range of 1.8-15 K at pressure from 18.5 GPa to 53.5 GPa. Inset image: temperature dependence of resistivity of GeP<sub>5</sub> under different magnetic fields up to 1 T at 53.5 GPa. (b) Resistance-pressure curves of ranging from 300 to 1.8 K of the starting materials (blue cycles) and the decompressed sample from 53.5 GPa (red cycles). Inset image: enlarged image for the decompressed sample.



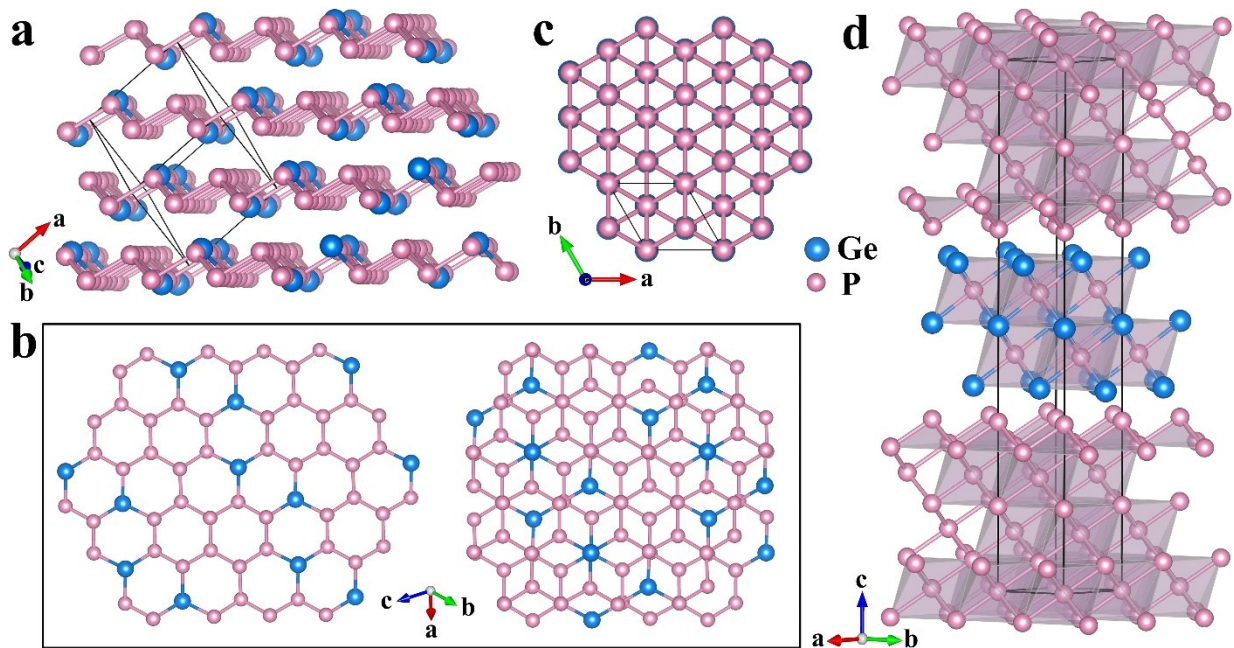

**Fig. S3.** Crystal structures of  $\text{GeP}_5$  with space group  $P\bar{1}$  (a and b) and  $P\bar{3}m1$  (c and d). (b) shows the top views of one (left panel) and two Ge-P layers (right panel). Large blue and small pink spheres represent Ge and P atoms, respectively.

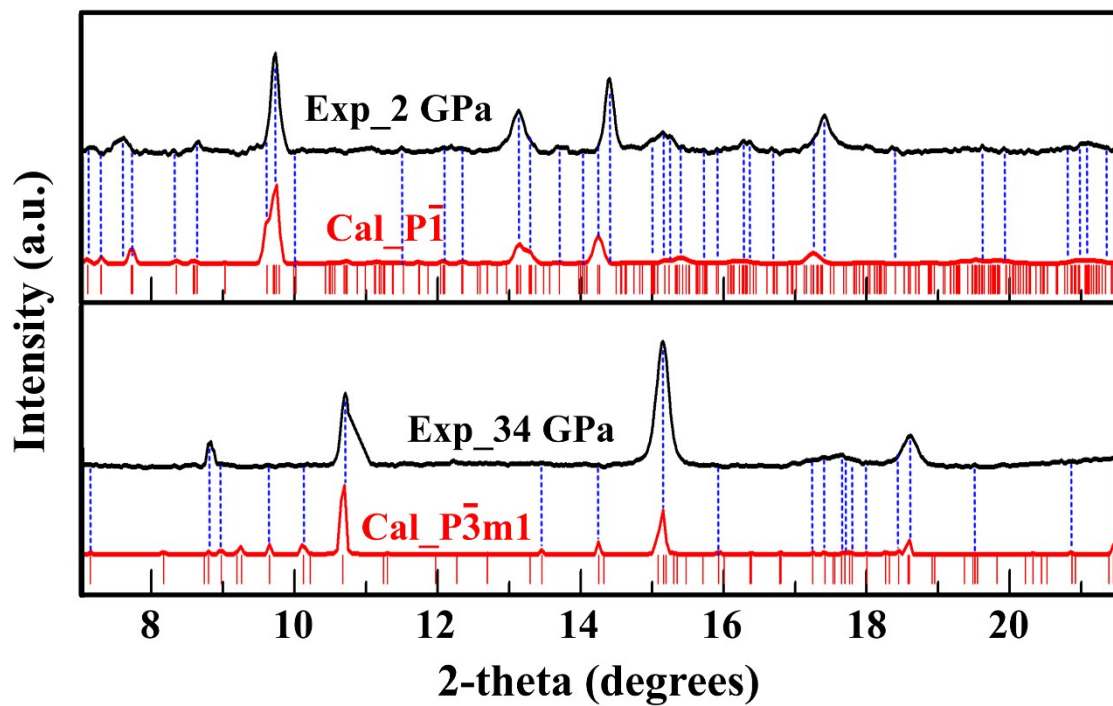

**Fig. S4.** Comparison of XRD patterns of the  $P\bar{1}$  and  $P\bar{3}m1$  structures along with the experimental data at 2 GPa and 34 GPa, respectively.

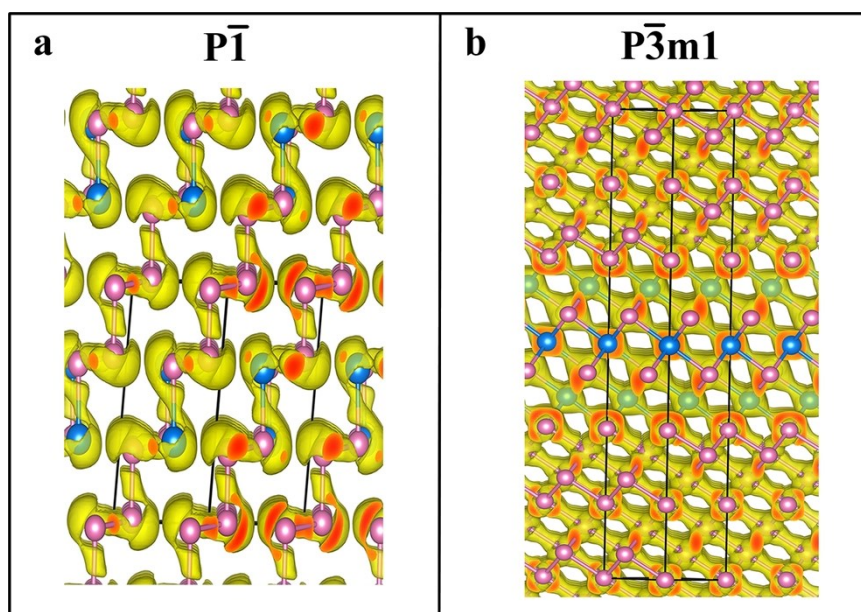

**Fig. S5.** Calculated valence electron localization functions (ELF) with isosurface value of 0.8 for the  $P\bar{1}$  structure (a) at ambient pressure, and of 0.7 for the  $P\bar{3}m1$  structure (b) at 16 GPa. The blue and pink spheres represent Ge and P atoms, respectively.

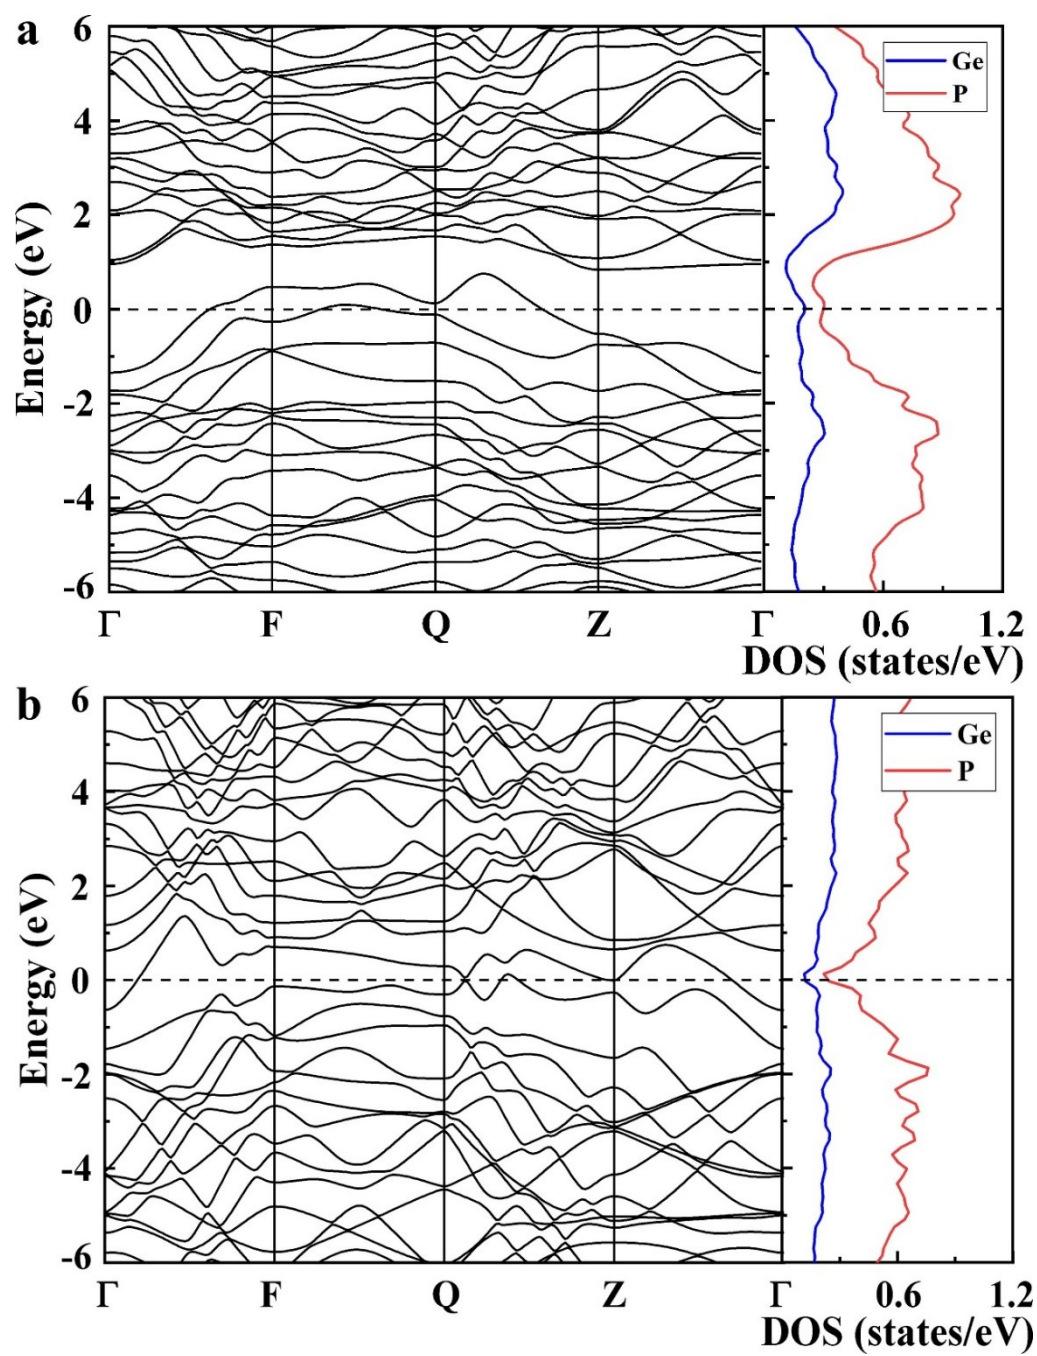

**Fig. S6.** The calculated band structures and partial electronic density of states (DOS) for low-pressure  $P\bar{1}$  phase of  $\text{GeP}_5$  at 0 (a) and 14 GPa (b).

**Table S1.** Calculated electron–phonon coupling (EPC) parameter  $\lambda$ , the logarithmic average phonon frequency  $\omega_{\log}$ , the density of states at the Fermi level per formula unit,  $N(E_F)$ , and the superconducting transition temperature  $T_c$  for the  $P\bar{1}$  and  $P\bar{3}_m1$  structures at selected pressures from 0 to 60 GPa.  $\mu^*$  of 0.1 was selected for the  $T_c$  calculation.

| Phase |               | P (GPa) | $\lambda$ | $\omega_{\log}$ (K) | $N(E_F)$ | $T_c$ (K) |
|-------|---------------|---------|-----------|---------------------|----------|-----------|
| LP    | $P\bar{1}$    | 0       | 0.40      | 223                 | 8.37     | 0.9       |
|       |               | 6       | 0.45      | 282                 | 9.89     | 2.2       |
|       |               | 10      | 0.57      | 302                 | 10.44    | 5.8       |
|       |               | 14      | 0.66      | 299                 | 10.79    | 9.1       |
| HP    | $P\bar{3}_m1$ | 16      | 0.73      | 297                 | 12.80    | 11.5      |
|       |               | 20      | 0.61      | 351                 | 12.61    | 8.6       |
|       |               | 30      | 0.54      | 388                 | 12.39    | 6.1       |
|       |               | 40      | 0.52      | 401                 | 12.39    | 5.5       |
|       |               | 60      | 0.49      | 401                 | 12.31    | 4.4       |
